# Supplementary material
Source: MDPI journal article supplement (https://www.mdpi.com/2071-1050/11/13/3622)
Supplement: s1 [file s1]

---

## Supplementary material

### S1. MRIO-based SDA

According to the MRIO, the following equation can be obtained from the balance between horizontal lines:

$$X = AX + F, \quad (1)$$

where  $X$  is the total output column vector,  $A$  is the direct consumption coefficient matrix, and  $F$  is the final use column vector (contains consumption, investment and export). After the equation conversion, we have:

$$X = (I - A)^{-1}F, \quad (2)$$

Let the superscripts  $r$  and  $s$  indicate the region and the subscripts  $i$  and  $j$  stand for the sector.  $G_i^r$  is the direct carbon dioxide emissions of sector  $i$  in region  $r$ , and then the carbon dioxide coefficient can be calculated from:  $C_i^r = G_i^r / X_i^r$ .

Let  $\text{diag}(C)$  be the diagonal matrix of the carbon dioxide coefficient, where  $C$  is the column vector for the CO<sub>2</sub> emissions coefficient of each sector in each region.  $G_{total}$  is the total carbon emissions. Substituting Equation (2) with a matrix, we obtain:

$$G_{total} = \text{diag}(C)X = \text{diag}(C)(I - A)^{-1}F, \quad (3)$$

For employment,  $W_i^r$  is the direct employees of sector  $i$  in region  $r$ , and  $W_{total}$  is the total employment. We can obtain the column vector of employment coefficient  $L$ , resulting in:

$$W_{total} = \text{diag}(L)X = \text{diag}(L)(I - A)^{-1}F, \quad (4)$$

with the Leontief inverse matrix  $(I - A)^{-1}$  as  $B$  and the carbon dioxide coefficient  $\text{diag}(C)$  and the employment coefficient  $\text{diag}(L)$  as  $\hat{C}$  and,  $\hat{L}$  respectively. In light of the simplicity and equivalence of Sun's [1] method with Diezenbacher and Los's [2] all average method, we apply Sun's [1] and Meng's [3] methods in the following spatial structural decomposition analysis, based on China's MRIO tables, and we provide corresponding equations based on the average of the two polar decompositions. It can be seen from the above equation that carbon dioxide emissions are affected by the carbon emissions coefficient  $\hat{C}$ , technology factor  $B$  and final demand  $F$ . Thus, the changes in carbon emission between the base year of 2007 and target year of 2012 can be expressed as:

$$\Delta G = G_{t1} - G_{t0} \quad (5)$$

$$\begin{aligned} &= \hat{C}_{t1}B_{t1}F_{t1} - \hat{C}_{t0}B_{t0}F_{t0} \\ &= \Delta\hat{C}B_{t0}F_{t0} + \hat{C}_{t0}\Delta BF_{t0} + \hat{C}_{t0}B_{t0}\Delta F + \Delta\hat{C}\Delta BF_{t0} + \Delta\hat{C}B_{t0}\Delta F + \hat{C}_{t0}\Delta B\Delta F + \Delta\hat{C}\Delta \\ &= \left[ \Delta\hat{C}B_{t0}F_{t0} + \frac{1}{2}\Delta\hat{C}(\Delta BF_{t0} + B_{t0}\Delta F) + \frac{1}{3}\Delta\hat{C}\Delta B\Delta F \right] \end{aligned} \quad (5.1)$$

$$+ \left[ \hat{C}_{t0}\Delta BF_{t0} + \frac{1}{2}(\Delta\hat{C}\Delta BF_{t0} + \hat{C}_{t0}\Delta B\Delta F) + \frac{1}{3}\Delta\hat{C}\Delta B\Delta F \right] \quad (5.2)$$

$$+ \left[ \hat{C}_{t0}B_{t0}\Delta F + \frac{1}{2}(\Delta\hat{C}B_{t0}\Delta F + \hat{C}_{t0}\Delta B\Delta F) + \frac{1}{3}\Delta\hat{C}\Delta B\Delta F \right] \quad (5.3)$$

Equation (5) shows that the carbon emission change between the base period ( $t_0$ ) and the end period ( $t_1$ ) can first be decomposed into three parts: the change caused by regional carbon intensity change  $\Delta\hat{C}$ , by technology change  $\Delta B$  and by final demand change  $\Delta F$ . In addition, the final demand  $F$  can be divided into domestic final demand  $FD$  and export  $E$  ( $E$  is

not divided into intermediate products or final products). Within,

$$FD = (K_2 FDK_1) \left[ FD(\text{diag}(K_2 FD))^{-1} \right] [\text{diag}(K_2 FD)/(K_2 FDK_1)] = fPD, \quad (6)$$

where  $K_1$  is a  $2R \times 1$  column vector with 1s, representing consumption and capital formation of  $R$  regions, while  $K_2$  is a  $1 \times RN$  row vector with 1s, representing final use of  $N$  sectors in  $R$  regions.  $f$  is a number representing the domestic final demand of all regions, while  $P$  is regarded as a region demand preference (consumption or investment), and  $D$  reflects the final demand structure of the region. The carbon emissions change caused by the final demand change can be similarly decomposed as equation (7).

$$\Delta FD = FD_{t1} - FD_{t0} \quad (7)$$

$$= f_{t1} P_{t1} D_{t1} - f_{t0} P_{t0} D_{t0}$$

$$= \left[ \Delta f P_{t0} D_{t0} + \frac{1}{2} \Delta f (\Delta P D_{t0} + P_{t0} \Delta D) + \frac{1}{3} \Delta f \Delta P \Delta D \right] \quad (7.1)$$

$$+ \left[ f \Delta P D_{t0} + \frac{1}{2} (\Delta f \Delta P D_{t0} + f_{t0} \Delta P \Delta D) + \frac{1}{3} \Delta f \Delta P \Delta D \right] \quad (7.2)$$

$$+ \left[ f_{t0} P_{t0} \Delta D + \frac{1}{2} (\Delta f P_{t0} \Delta D + f_{t0} \Delta P \Delta D) + \frac{1}{3} \Delta f \Delta P \Delta D \right] \quad (7.3)$$

Therefore,  $\Delta FD$  is decomposed into changes in final demand scale  $\Delta s$ , changes in regional final demand preference for products of different sectors  $\Delta P$ , and changes in expenditure structure of regional final demand  $\Delta D$ , i.e., the share of consumption and investment in regional final demand.

Similar to the decomposition of Equation (7), the regional carbon emission change caused by exports is:

$$E = (K_2 E) [E / K_2 E] = f^E P^E, \quad (8)$$

The carbon emission changes caused by export  $\Delta E$  can be further decomposed into two parts: changes in export scale  $\Delta f^E$  and in export preference for products of different sectors  $\Delta P^E$ .

$$\begin{aligned} \Delta E &= E_{t1} - E_{t0} \\ &= f_{t1}^E P_{t1}^E - f_{t0}^E P_{t0}^E \\ &= \left[ \Delta f^E P_{t0}^E + \frac{1}{2} \Delta f^E \Delta P^E \right] + \left[ f_{t0}^E \Delta P^E + \frac{1}{2} \Delta f^E \Delta P^E \right] \end{aligned} \quad (9)$$

Considering the above equations comprehensively, the regional carbon emission change shown in Equation (5) can ultimately be expressed as:

$$\Delta G = G_{t1} - G_{t0} \quad (10)$$

$$= \hat{C}_{t1} B_{t1} F_{t1} - \hat{C}_{t0} B_{t0} F_{t0}$$

$$= \hat{C}_{t1} B_{t1} (FD_{t1} + E_{t1}) - \hat{C}_{t0} B_{t0} (FD_{t0} + E_{t0})$$

$$= \hat{C}_{t1} B_{t1} (f_{t1} P_{t1} D_{t1} + f_{t1}^E P_{t1}^E) - \hat{C}_{t0} B_{t0} (f_{t0} P_{t0} D_{t0} + f_{t0}^E P_{t0}^E)$$

$$= \left[ \Delta \hat{C} B_{t0} F_{t0} + \frac{1}{2} \Delta \hat{C} (\Delta B F_{t0} + B_{t0} \Delta F) + \frac{1}{3} \Delta \hat{C} \Delta B \Delta F \right] \quad (10.1)$$

$$+ \left[ \hat{C}_{t0} \Delta B F_{t0} + \frac{1}{2} (\Delta \hat{C} \Delta B F_{t0} + \hat{C}_{t0} \Delta B \Delta F) + \frac{1}{3} \Delta \hat{C} \Delta B \Delta F \right] \quad (10.2)$$

$$+ \left[ \hat{C}_{t0} B_{t0} + \frac{1}{2} (\Delta \hat{C} B_{t0} + \hat{C}_{t0} \Delta B) + \frac{1}{3} \Delta \hat{C} \Delta B \right] \cdot \left[ \Delta f P_{t0} D_{t0} + \frac{1}{2} \Delta f (\Delta P D_{t0} + P_{t0} \Delta D) + \frac{1}{3} \Delta f \Delta P \Delta D \right]$$

$$75 \quad (10.3)$$

$$76 \quad + \left[ \hat{C}_{t0} B_{t0} + \frac{1}{2} (\Delta \hat{C} B_{t0} + \hat{C}_{t0} \Delta B) + \frac{1}{3} \Delta \hat{C} \Delta B \right] \cdot \left[ \Delta f^E P_{t0}^E + \frac{1}{2} \Delta f^E \Delta P^E \right] \quad (10.4)$$

$$77 \quad + \left[ \hat{C}_{t0} B_{t0} + \frac{1}{2} (\Delta \hat{C} B_{t0} + \hat{C}_{t0} \Delta B) + \frac{1}{3} \Delta \hat{C} \Delta B \right] \cdot \left[ f \Delta P D_{t0} + \frac{1}{2} (\Delta f \Delta P D_{t0} + f_{t0} \Delta P \Delta D) + \frac{1}{3} \Delta f \Delta P \Delta D \right]$$

$$78 \quad (10.5)$$

$$79 \quad + \left[ \hat{C}_{t0} B_{t0} + \frac{1}{2} (\Delta \hat{C} B_{t0} + \hat{C}_{t0} \Delta B) + \frac{1}{3} \Delta \hat{C} \Delta B \right] \cdot \left[ f_{t0}^E \Delta P^E + \frac{1}{2} \Delta f^E \Delta P^E \right] \quad (10.6)$$

$$80 \quad + \left[ \hat{C}_{t0} B_{t0} + \frac{1}{2} (\Delta \hat{C} B_{t0} + \hat{C}_{t0} \Delta B) + \frac{1}{3} \Delta \hat{C} \Delta B \right] \cdot \left[ f_{t0} P_{t0} \Delta D + \frac{1}{2} (\Delta f P_{t0} \Delta D + f_{t0} \Delta P \Delta D) + \frac{1}{3} \Delta f \Delta P \Delta D \right]$$

$$81 \quad (10.7)$$

## 82 S2. Classification of production sectors

83 **Table S1.** Classification of production sectors

| Code | Sector Code                                     | New Code | New Sector Code                |
|------|-------------------------------------------------|----------|--------------------------------|
| S1   | Agriculture                                     | S1       | Agriculture                    |
| S2   | Coal mining and processing                      | S2       | Resource exploitation          |
| S3   | Crude petroleum and natural gas                 |          |                                |
| S4   | Metal ore mining                                |          |                                |
| S5   | Non-metallic minerals and other mining          |          |                                |
| S6   | Food processing and tobaccos                    | S3       | Light industry                 |
| S7   | Textile                                         |          |                                |
| S8   | Clothing, leather, fur, etc.                    |          |                                |
| S9   | Wood processing and furnishing                  |          |                                |
| S10  | Paper making, printing, stationery, etc.        | S4       | Petrochemical industry         |
| S11  | Petroleum refining coking and nuclear fuel      |          |                                |
| S12  | Chemical industry                               | S5       | Raw material manufacturing     |
| S13  | Non-metallic mineral products                   |          |                                |
| S14  | Metal smelting and processing                   |          |                                |
| S15  | Metal products                                  |          |                                |
| S16  | General and specialist machinery                | S6       | Equipment manufacturing        |
| S17  | Transport equipment                             |          |                                |
| S18  | Electrical equipment                            |          |                                |
| S19  | Electronic equipment                            |          |                                |
| S20  | Instrument and meter                            | S7       | Electricity and gas supply     |
| S21  | Other manufacturing                             |          |                                |
| S22  | Electricity and hot water production and supply |          |                                |
| S23  | Gas and water production and supply             |          |                                |
| S24  | Construction                                    | S8       | Construction                   |
| S25  | Transportation and warehousing                  | S9       | Transportation and warehousing |
| S26  | Wholesale and retailing                         | S10      | Other services                 |

|     |                                 |
|-----|---------------------------------|
| S27 | Hotel and restaurant            |
| S28 | Leasing and commercial services |
| S29 | Scientific research             |
| S30 | Other services                  |

### 84 S3. Own influences and spillover effects by region

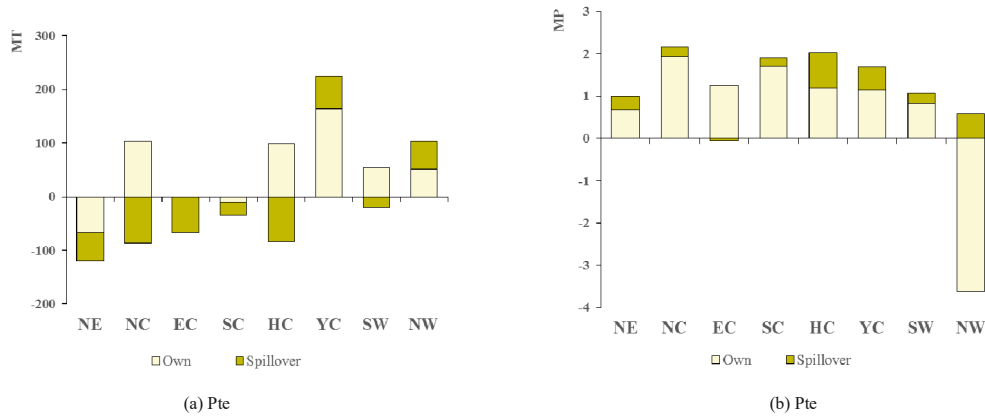

85

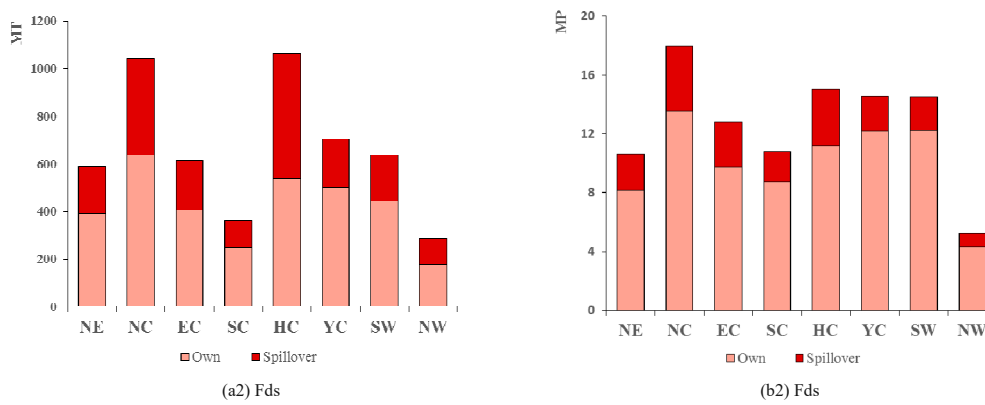

86

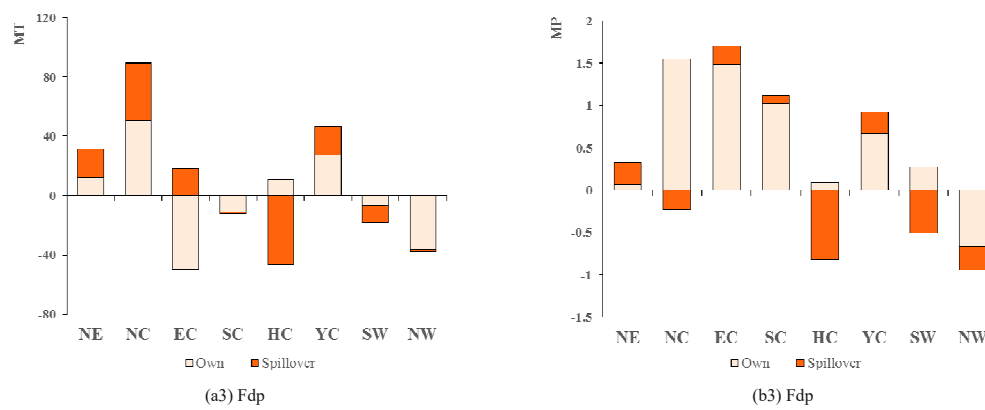

87

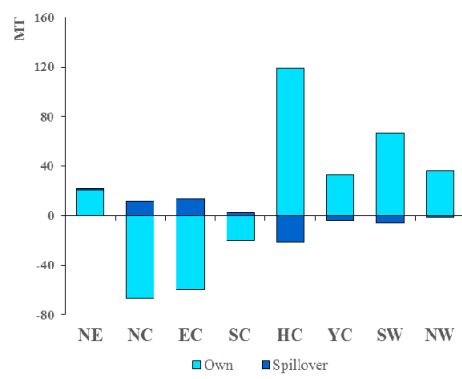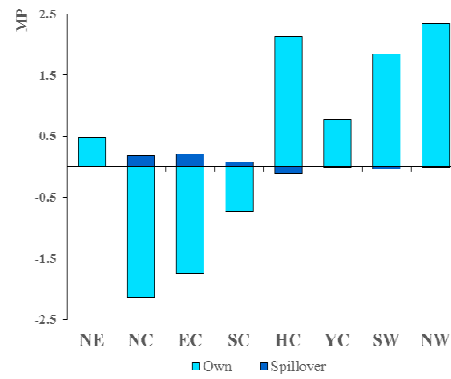

(a4) Fse

(b4) Fse

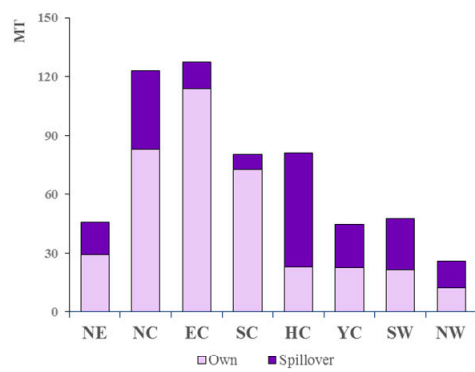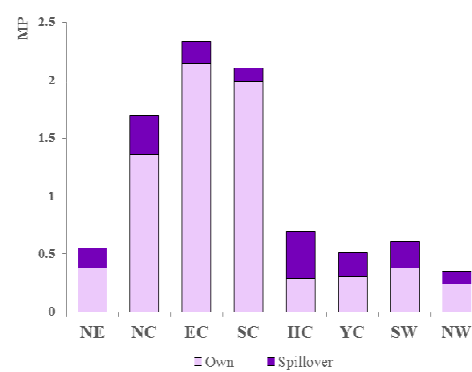

(a5) Ese

(b5) Ese

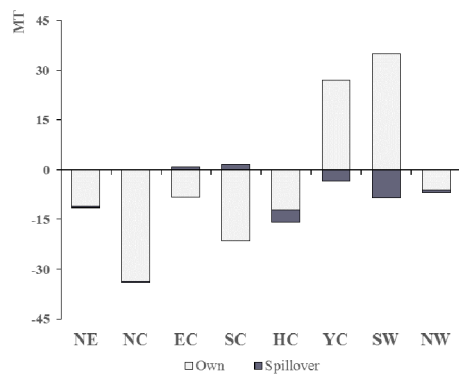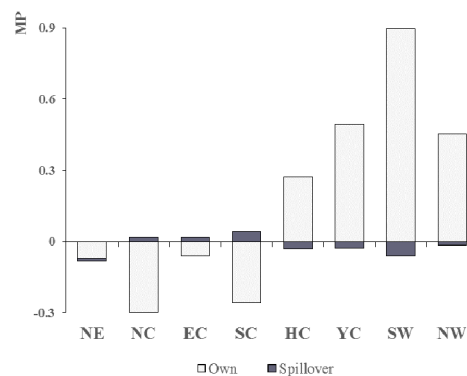

(a6) Epe

(b6) Epe

(a) Effects on carbon emissions

(b) Effects on Employment

**Figure S1. Own influences and spillover effects**

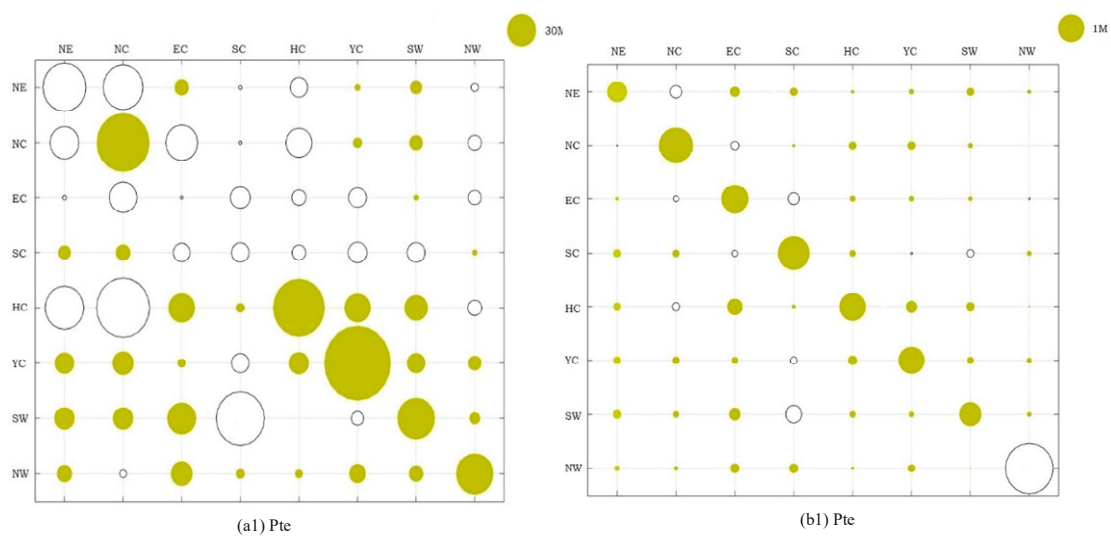

101

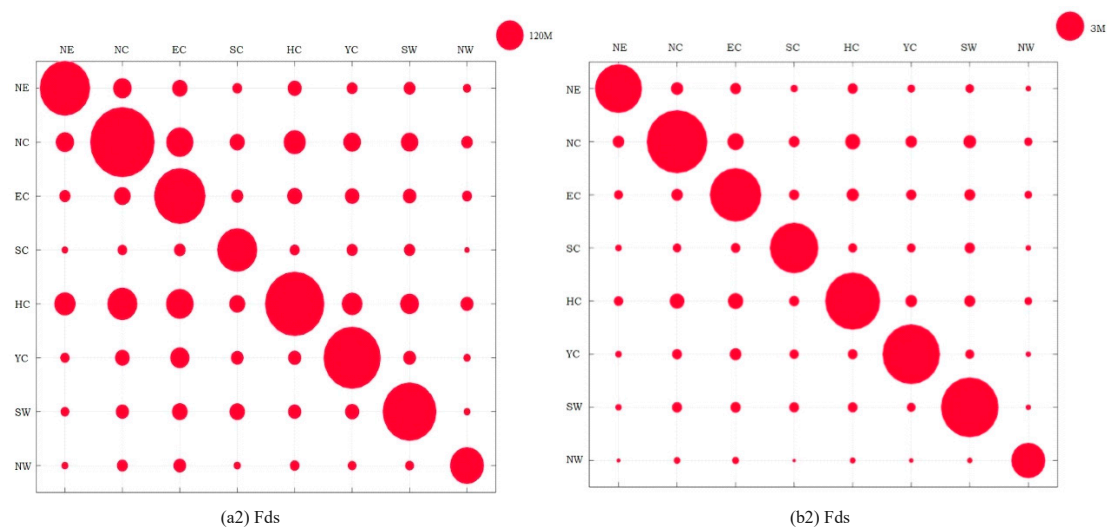

102

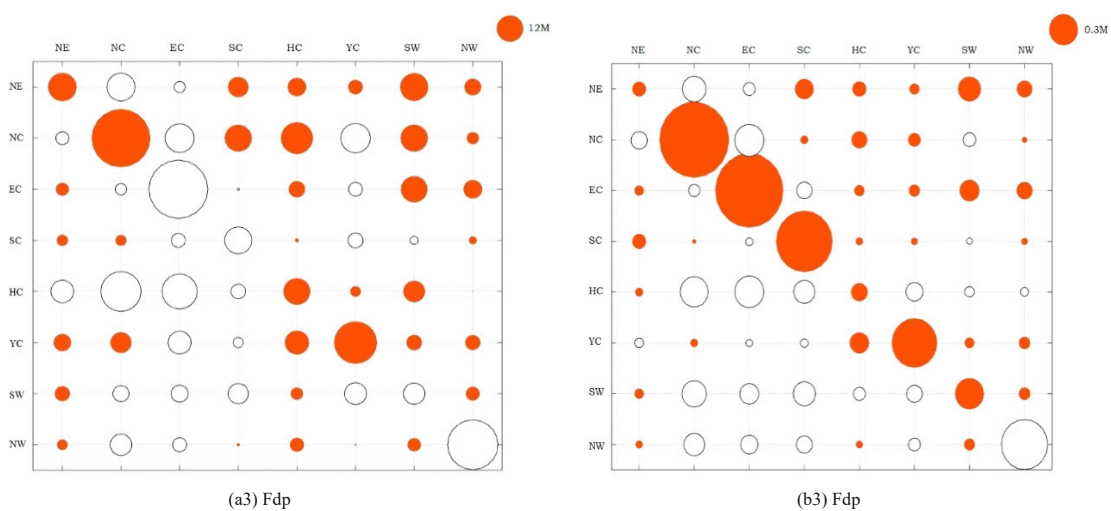

103

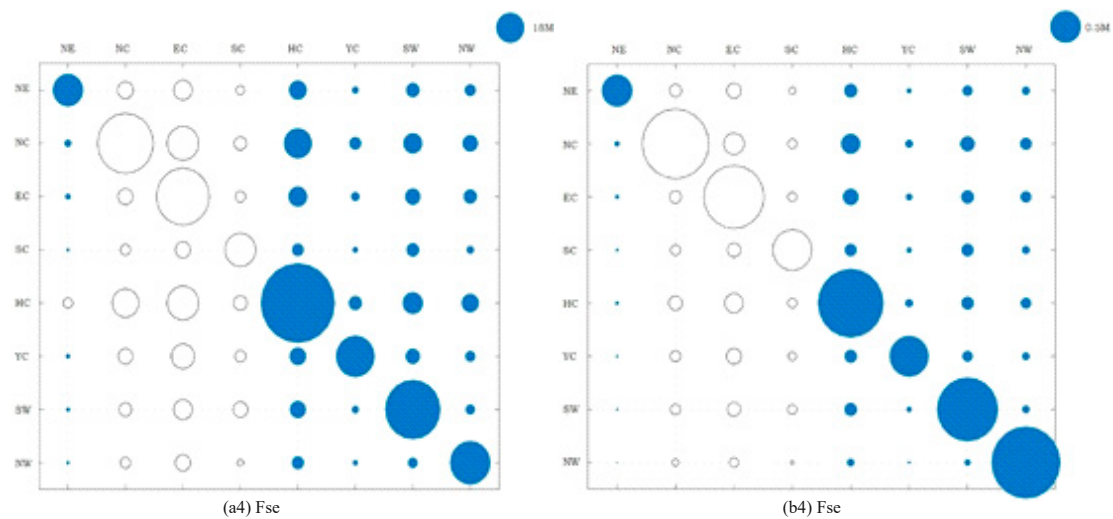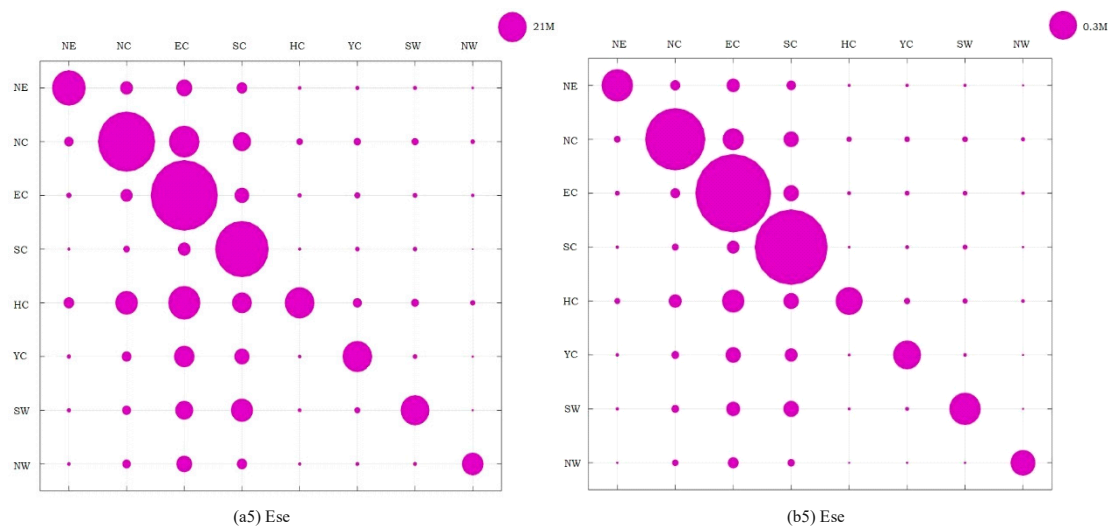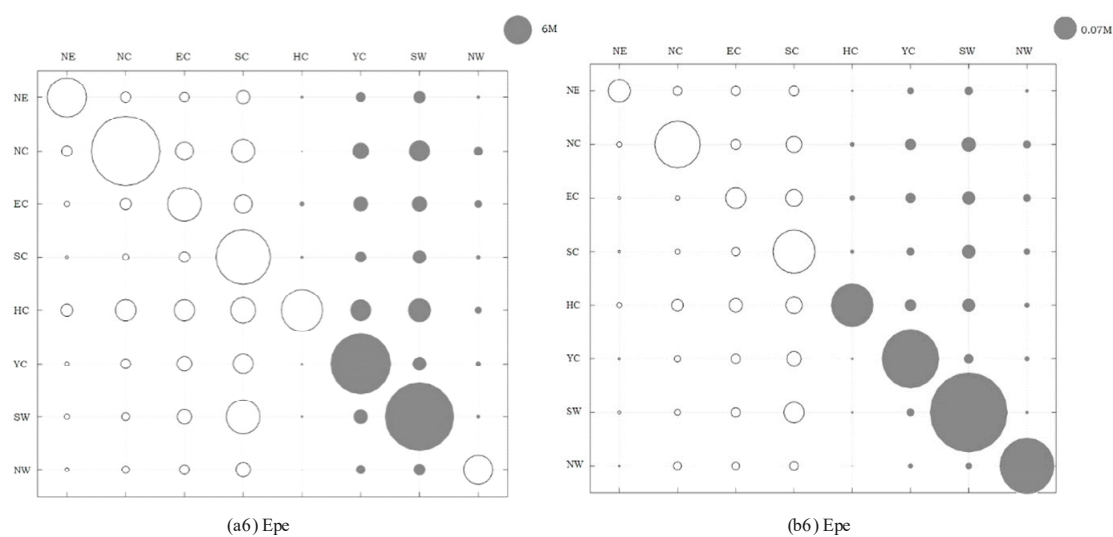

(a) Effects on carbon emissions

(b) Effects on employment

**Figure S2.** Bilateral spillover effects

Note: the direction of spillover effect is from the regions in the left row to those in the top

line. Solid circles mean positive value and hollow circles mean negative value.

## S5. Positive spillover effects analysis

| Code | Region                      | Pte | Fds | Fdp | Fse | Ese | Epe | Total |
|------|-----------------------------|-----|-----|-----|-----|-----|-----|-------|
| NE   | Northeast Region            | 34% | 8%  | 25% | 8%  | 0%  | 36% | 19%   |
| NC   | North Coastal               | 32% | 20% | 51% | 20% | 20% | 11% | 13%   |
| EC   | East Coastal                | 10% | 33% | 34% | 33% | 22% | 14% | 25%   |
| SC   | Southern Coastal            | 3%  | 56% | 20% | 68% | 37% | 14% | 42%   |
| HC   | Middle of the Yellow River  | 0%  | 11% | 26% | 11% | 0%  | 0%  | 8%    |
| YC   | Middle of the Yangtze River | 22% | 12% | 23% | 12% | 0%  | 11% | 10%   |
| SW   | Southwest Region            | 11% | 10% | 42% | 21% | 0%  | 21% | 18%   |
| NW   | Northwest Region            | 14% | 3%  | 45% | 3%  | 3%  | 32% | 16%   |

**Figure S3.** Regions' positive spillover effects on other regions

Note: The data are proportions of GDP of eligible regions in total

| Code   | NE               | NC            | EC           | SC               | HC                         | YC                          | SW               | NW               |
|--------|------------------|---------------|--------------|------------------|----------------------------|-----------------------------|------------------|------------------|
| Region | Northeast Region | North Coastal | East Coastal | Southern Coastal | Middle of the Yellow River | Middle of the Yangtze River | Southwest Region | Northwest Region |
| Pte    | 0%               | 20%           | 32%          | 3%               | 10%                        | 29%                         | 30%              | 14%              |
| Fds    | 8%               | 20%           | 22%          | 14%              | 11%                        | 12%                         | 10%              | 3%               |
| Fdp    | 34%              | 55%           | 52%          | 51%              | 14%                        | 23%                         | 0%               | 11%              |
| Fse    | 8%               | 20%           | 22%          | 14%              | 11%                        | 12%                         | 10%              | 3%               |
| Ese    | 0%               | 20%           | 22%          | 14%              | 0%                         | 0%                          | 0%               | 3%               |
| Epe    | 0%               | 3%            | 8%           | 0%               | 71%                        | 0%                          | 10%              | 64%              |
| Total  | 10%              | 20%           | 23%          | 16%              | 19%                        | 15%                         | 12%              | 15%              |

**Figure S4.** Regions with positive spillover effects from other regions

Note: The data are proportions of GDP of eligible regions in total

## References

1. Sun, J., Changes in energy consumption and energy intensity: a complete decomposition model. Energy economics 1998, 20, (1), 85-100.
2. Dietzenbacher, E.; Los, B., Structural decomposition techniques: sense and sensitivity. Economic Systems Research 1998, 10, (4), 307-324.
3. Meng, B.; Wang, J.; Andrew, R.; Xiao, H.; Xue, J.; Peters, G. P., Spatial spillover effects in determining China's regional CO2 emissions growth: 2007–2010. Energy Economics 2017, 63, 161-173.
